# Supplementary material for: Chemoselective probe for detailed analysis of ketones and aldehydes produced by gut microbiota in human samples
Source: Royal Society of Chemistry journal article supplement (doi:10.1039/c9cc04605d), 2019-01-01

## SUPPORTING INFORMATION

### Chemoselective Probe for Detailed Analysis of Ketones and Aldehydes Produced by Gut Microbiota in Human Samples

Louis P. Conway<sup>a</sup>, Neeraj Garg<sup>a</sup>, Weifeng Lin<sup>a</sup>, Miroslav Vujasinovic<sup>b</sup>, J.-Matthias Löhr<sup>b,c</sup>, and Daniel Globisch<sup>a,\*</sup>

- [a] Department of Medicinal Chemistry, Science for Life Laboratory  
Uppsala University  
Box 574, SE-75123 Uppsala, Sweden
- [b] Department for Digestive Diseases, Karolinska University Hospital, Stockholm, Sweden
- [c] Department of Clinical Science, Intervention and Technology (CLINTEC), Karolinska Institute, Stockholm, Sweden

### Contents

|                                                                  |    |
|------------------------------------------------------------------|----|
| 1. Supporting schemes.....                                       | 2  |
| 2. Supporting figures .....                                      | 3  |
| 3. Supporting tables .....                                       | 9  |
| 4. General .....                                                 | 10 |
| 5. Ethical approval.....                                         | 11 |
| 6. Description of procedures .....                               | 11 |
| 6.1 UHPLC-MS analysis.....                                       | 11 |
| 6.2 Preparation of bead-bound, unactivated probe 8 .....         | 12 |
| 6.3 Activation of carbonyl-specific chemoselective probe 2 ..... | 12 |
| 6.4 Preparation of fecal metabolite extracts.....                | 12 |
| 6.5 Treatment of fecal metabolite extracts .....                 | 12 |
| 6.6 Cleavage of the bead-bound chemical probe 3.....             | 12 |
| 6.7 Synthesis of Fmoc-protected simplified probe 11 .....        | 13 |
| 6.8 Preparation of probe-conjugated standards .....              | 13 |
| 6.9 LC-MS analysis .....                                         | 13 |
| 6.10 Data analysis .....                                         | 13 |
| 6.11 Signal to noise calculation.....                            | 14 |
| 7. References .....                                              | 14 |
| 8. NMR Spectra.....                                              | 15 |
| 1. Compound 11 <sup>1</sup> H NMR Spectrum .....                 | 15 |
| 2. Compound 11 <sup>13</sup> C NMR Spectrum.....                 | 16 |
| 3. Compound 11 COSY NMR Spectrum .....                           | 17 |
| 4. Compound 11 HSQC NMR Spectrum .....                           | 18 |
| 5. Compound 11 HMBC NMR Spectrum .....                           | 19 |

## 1. Supporting schemes

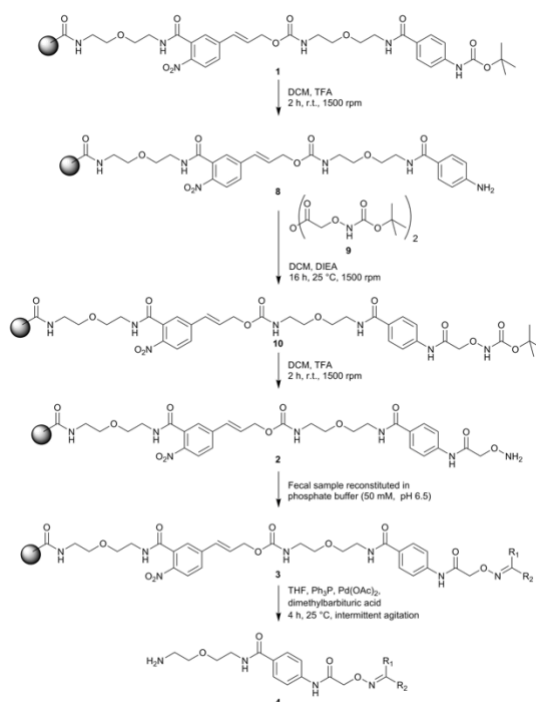

**Scheme S1:** Preparation of chemical probe activated for carbonyl conjugation.

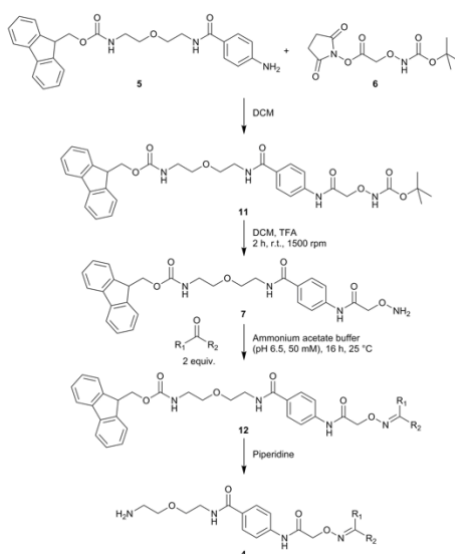

**Scheme S2:** Preparation of simplified chemical probe activated for carbonyl conjugation.

## 2. Supporting figures

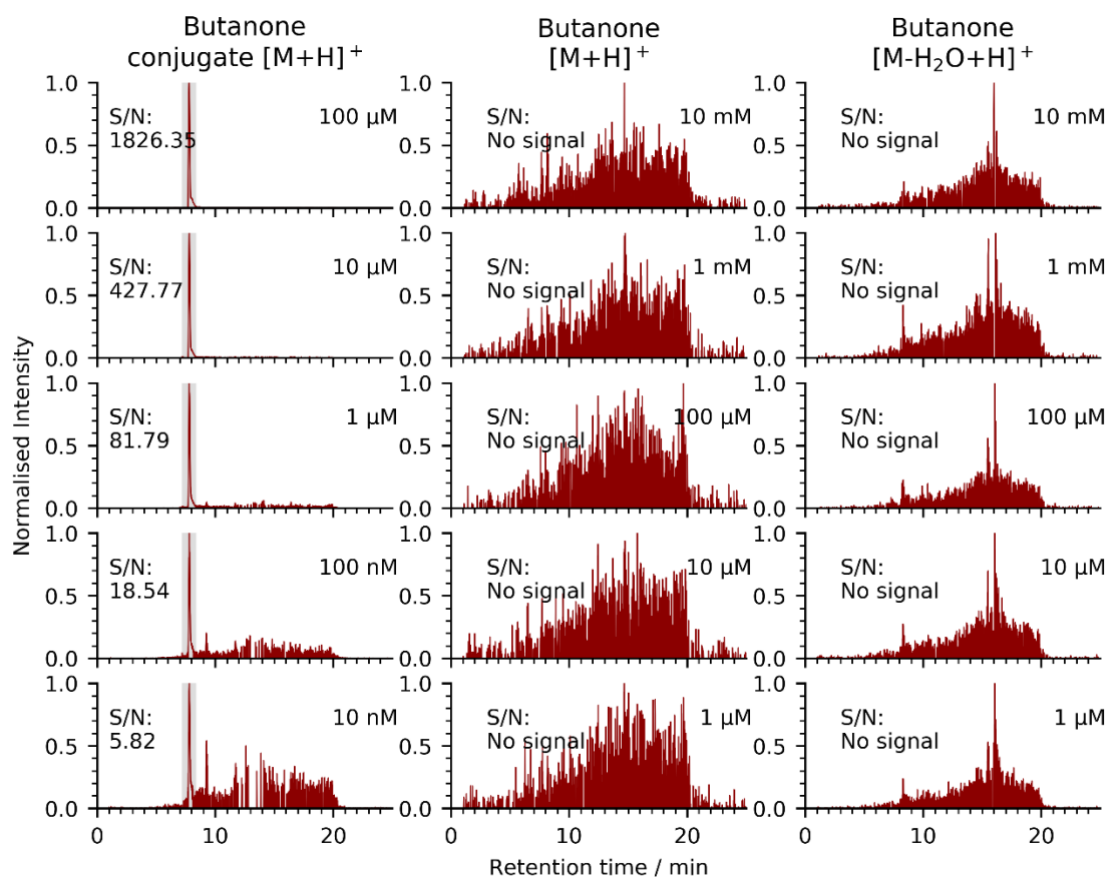

**Figure S1:** Extracted ion chromatograms (30 ppm) resulting from injections of butanone and its conjugate **4a** at a range of concentrations.

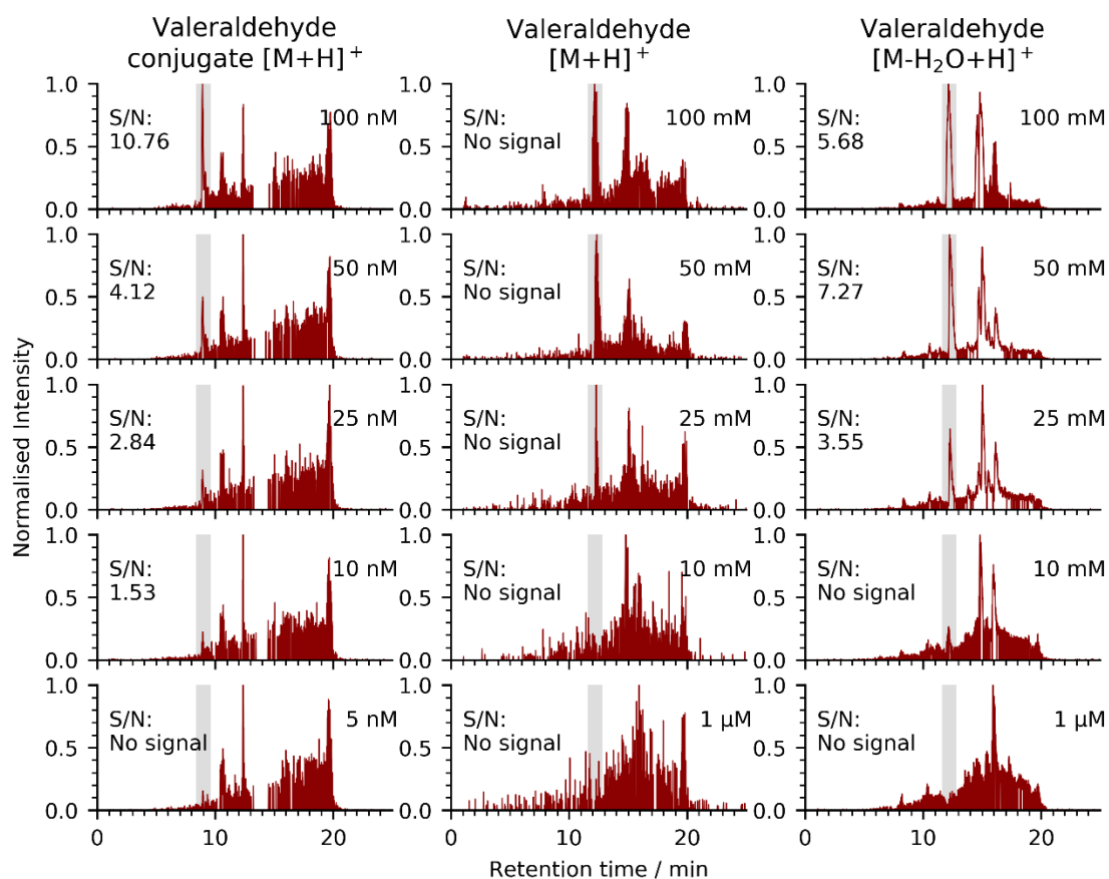

**Figure S2:** Extracted ion chromatograms (30 ppm) resulting from injections of valeraldehyde and its conjugate **4b** at a range of concentrations.

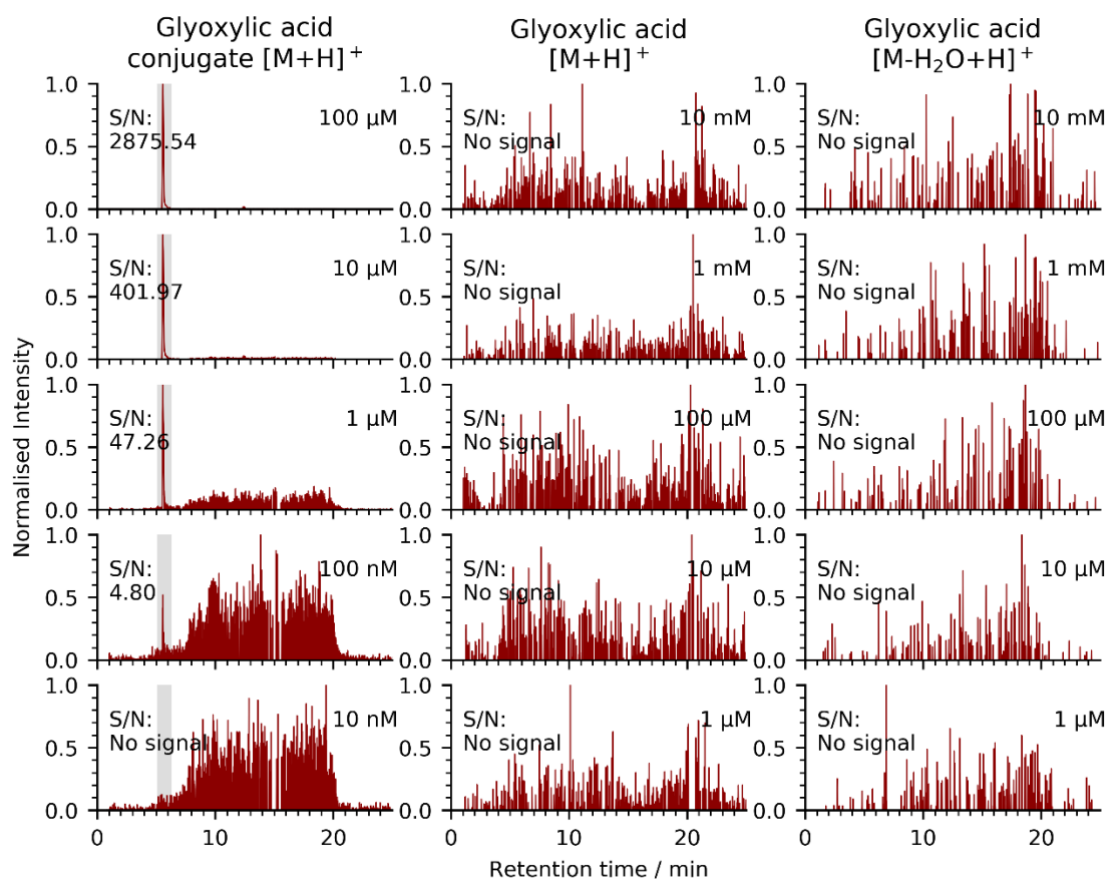

**Figure S3:** Extracted ion chromatograms (30 ppm) resulting from injections of glyoxylic acid and its conjugate **4d** at a range of concentrations.

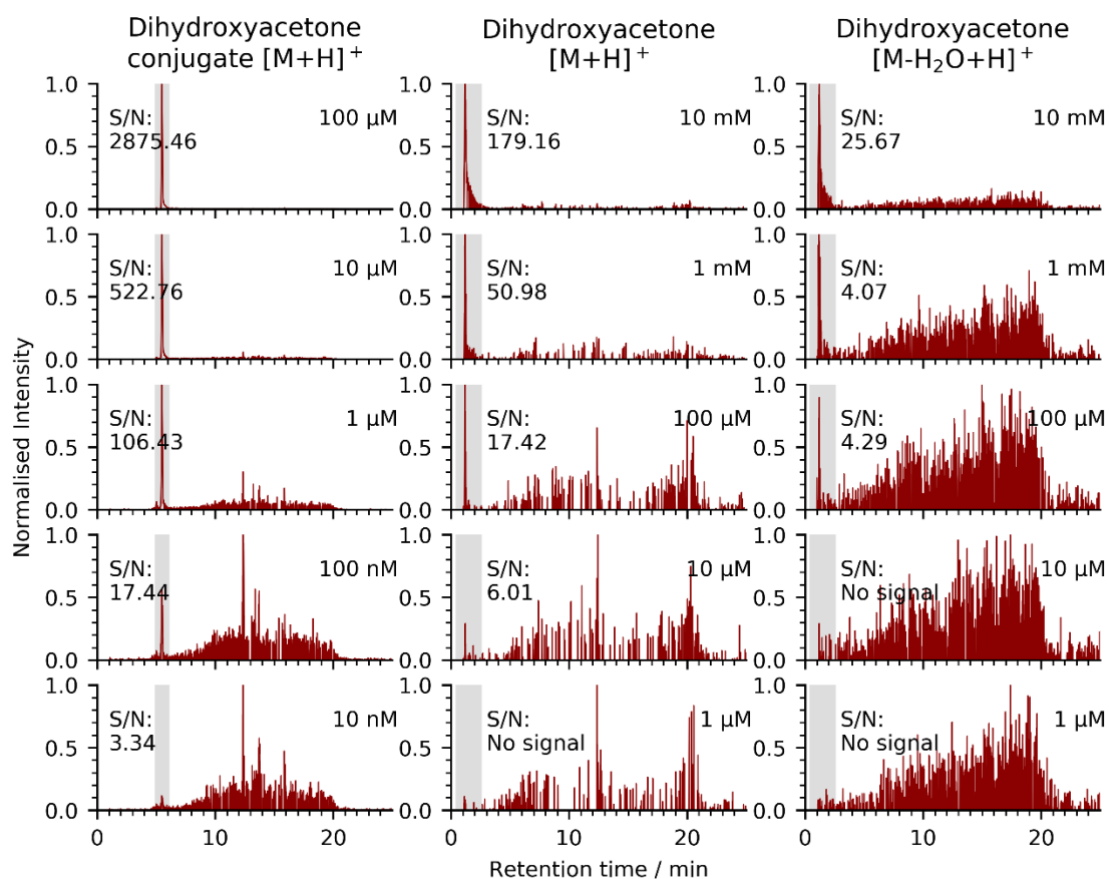

**Figure S4:** Extracted ion chromatograms (30 ppm) resulting from injections of dihydroxyacetone and its conjugate **4e** at a range of concentrations.

| SM | 7f | 9f |                                                                                              |
|----|----|----|----------------------------------------------------------------------------------------------|
|    |    |    | - D-Glucose                                                                                  |
|    |    |    | - Glucuronic acid isomer                                                                     |
|    |    |    | - D-Ribose                                                                                   |
|    |    |    | - 5-Aminopentanal                                                                            |
|    |    |    | - Erythrose                                                                                  |
|    |    |    | - 2-Keto-3-deoxy-D-gluconic acid; 3-Keto-b-D-galactose; D-Arabo-hexos-2-ulose                |
|    |    |    | - Amino oxohexanoic acid and isomers                                                         |
|    |    |    | - Pentose disaccharide                                                                       |
|    |    |    | - Glyceraldehyde; Dihydroxyacetone                                                           |
|    |    |    | - L-Erythrulose                                                                              |
|    |    |    | - Deoxyribose                                                                                |
|    |    |    | - Dihydroxyacetone                                                                           |
|    |    |    | - Fucose isomer                                                                              |
|    |    |    | - Glycolaldehyde                                                                             |
|    |    |    | - Methylisopelletierine isomer                                                               |
|    |    |    | - Glyoxylic acid                                                                             |
|    |    |    | - 2-Acetolactate; 2-Hydroxy-4-oxopentanoic acid                                              |
|    |    |    | - Oxymorphone; Noroxycodone                                                                  |
|    |    |    | - Glycolaldehyde                                                                             |
|    |    |    | - 3-Hydroxypropanal                                                                          |
|    |    |    | - Noroxymorphone                                                                             |
|    |    |    | - 2-(4-Methyl-1,3-pentadienyl)anthraquinone                                                  |
|    |    |    | - Pyroglutamylglycine                                                                        |
|    |    |    | - Oxovaleric acid isomer                                                                     |
|    |    |    | - Dehydroascorbic acid                                                                       |
|    |    |    | - Malonic semialdehyde; Glucosereductone                                                     |
|    |    |    | - 3-Oxoalanine                                                                               |
|    |    |    | - Lactaldehyde                                                                               |
|    |    |    | - Dopamine quinone                                                                           |
|    |    |    | - Ketoleucine isomer                                                                         |
|    |    |    | - Laccarin                                                                                   |
|    |    |    | - 1-Hydroxy-2-butanone                                                                       |
|    |    |    | - 1-Hydroxy-2-butanone                                                                       |
|    |    |    | - Oxolan-3-one; Diacetyl                                                                     |
|    |    |    | - Methyloxopropanoic acid isomer                                                             |
|    |    |    | - L-2-Amino-3-oxobutanoic acid; L-Aspartate-semialdehyde                                     |
|    |    |    | - Malondialdehyde                                                                            |
|    |    |    | - 7-Hydroxy-6-(3-oxobut-1-en-1-yl)-2H-chromen-2-one; Wyeronic acid                           |
|    |    |    | - 2,3-Hexanedione; 3,4-Hexanedione; 3-Hexenoic acid; 4-Methyl-2,3-pentanedione; 5-Oxohexanal |
|    |    |    | - Methyloxopropanoic acid isomer                                                             |
|    |    |    | - Acetoin                                                                                    |
|    |    |    | - 2-Amino-3-carboxymuconic acid semialdehyde                                                 |
|    |    |    | - Ethyl 2,4-dioxohexanoate                                                                   |
|    |    |    | - 2-Keto-6-acetamidocaproate                                                                 |
|    |    |    | - Oxovaleric acid isomer                                                                     |
|    |    |    | - 3-Hydroxy-2-pentanone; 1-Hydroxy-2-pentanone                                               |
|    |    |    | - Maltol isomer                                                                              |
|    |    |    | - Artonin T isomer                                                                           |
|    |    |    | - 14-Oxo-DoHE(1-)                                                                            |
|    |    |    | - 5-Methoxynoracronycine; Junosidine                                                         |
|    |    |    | - Tartronate semialdehyde                                                                    |
|    |    |    | - $C_{20}H_{27}N_3O_7S$                                                                      |
|    |    |    | - Sedoheptulose 7-phosphate(2-)                                                              |
|    |    |    | - Acrolein                                                                                   |
|    |    |    | - Mercaptomethylpentanal isomer                                                              |
|    |    |    | - 5-Aminolevulinic acid isomer                                                               |

**Figure S5:** The first half of the total 112 metabolites detected after analysis of fecal samples using the carbonyl-specific chemical probe. Red indicates no detection, yellow denotes metabolites which are annotated on the basis of mass, while green represents metabolites which have been validated with commercial standards.

| SM | TF | qf |                                                                                             |
|----|----|----|---------------------------------------------------------------------------------------------|
|    |    |    | - Olisalazine-O-sulfate                                                                     |
|    |    |    | - N-Acetylgalactosamine 4,6-disulfate                                                       |
|    |    |    | - $C_{15}H_{10}O_{10}S$                                                                     |
|    |    |    | - Propanal                                                                                  |
|    |    |    | - Eremopetasin sulfoxide                                                                    |
|    |    |    | - Isorhamnetin 3-(6"-malonylglucoside)                                                      |
|    |    |    | - Oxolan-3-one; Diacetyl                                                                    |
|    |    |    | - Limonin; Zapoterin                                                                        |
|    |    |    | - Dihydroxyacetone Phosphate Acyl Ester                                                     |
|    |    |    | - Succinylacetone; xi-2,3-Dihydro-3,5-dihydroxy-6-methyl-4H-pyran-4-one                     |
|    |    |    | - Nepetalic acid isomer                                                                     |
|    |    |    | - Garcidul B isomer                                                                         |
|    |    |    | - 4-Hydroxybenzaldehyde                                                                     |
|    |    |    | - 6"-O-Acetylglycitin isomer                                                                |
|    |    |    | - 4-Methyl-4-(methylthio)-2-pentanone; 3-(Methylthio)hexanal                                |
|    |    |    | - Amino oxohexanoic acid isomers                                                            |
|    |    |    | - Hydroxymethylbenzaldehyde isomer                                                          |
|    |    |    | - Oxovaleric acid isomer                                                                    |
|    |    |    | - 2-Acetyloxazole                                                                           |
|    |    |    | - Botryodiplodin; Methyl (R)-3-methyl-2-oxopentanoate; Ethyl levulinate                     |
|    |    |    | - Amino oxohexanoic acid isomer                                                             |
|    |    |    | - Pelletierine or conhydrinone isomer                                                       |
|    |    |    | - Dukunolide D; Jangomolide                                                                 |
|    |    |    | - Cyclomorusin; Cudraflavone A                                                              |
|    |    |    | - 3'-Prenylapigenin 7-[rhamnosyl-(1->6)-glucoside]                                          |
|    |    |    | - Epoxyartemisla ketone or epoxycampholenic aldehyde isomer                                 |
|    |    |    | - Ketoleucine isomer                                                                        |
|    |    |    | - Formylfusarochromanone                                                                    |
|    |    |    | - Iso-Valeraldehyde                                                                         |
|    |    |    | - 3,3-Dimethyloxirane-2-carbaldehyde; Glutaral; 2,3-Pentanedione; 2,4-Pentanedione          |
|    |    |    | - Ketoleucine isomer                                                                        |
|    |    |    | - Pentanal                                                                                  |
|    |    |    | - 2-Methylbutanal                                                                           |
|    |    |    | - Sedanonic acid isomer                                                                     |
|    |    |    | - Benzaldehyde                                                                              |
|    |    |    | - Cyclopentanone isomer                                                                     |
|    |    |    | - Methylbenzaldehyde isomer                                                                 |
|    |    |    | - 9-Oxononanoic acid isomer                                                                 |
|    |    |    | - 2-Ethylbutanal                                                                            |
|    |    |    | - Hexanal                                                                                   |
|    |    |    | - Hexanal isomer                                                                            |
|    |    |    | - Oxononanal isomer                                                                         |
|    |    |    | - Octadienal isomer                                                                         |
|    |    |    | - Methylcinnamaldehyde isomer                                                               |
|    |    |    | - Methylcinnamaldehyde isomer                                                               |
|    |    |    | - 2-Octanone; Ethyl pentyl ketone; 2-Methyl-3-heptanone                                     |
|    |    |    | - 7-Ketodeoxycholic acid; 3,7-Dihydroxy-12-oxocholanoic acid; 3-Oxochoic acid               |
|    |    |    | - 2-Octanone; Ethyl pentyl ketone; 2-Methyl-3-heptanone                                     |
|    |    |    | - Teresantalal; 3-Caren-5-one; (-)-Pinocarvone; Piperitenone; Perillyl aldehyde             |
|    |    |    | - Filbertone; Ocetenal isomers                                                              |
|    |    |    | - Octanal                                                                                   |
|    |    |    | - 1-Deoxy-D-xylulose; Deoxyribose                                                           |
|    |    |    | - Hydrocodone; Erysodine; Pandamarilactone 32; N-depropylpropafenone; N-desalkylpropafenone |
|    |    |    | - 1-Deoxy-D-xylulose                                                                        |
|    |    |    | - N-Acetyl-5-methoxykynuramine; Hexobarbital                                                |
|    |    |    | - Dukunolide D; Jangomolide                                                                 |

**Figure S6:** The second half of the total 112 metabolites detected after analysis of fecal samples using the carbonyl-specific chemical probe. Red indicates no detection, yellow denotes metabolites which are annotated on the basis of mass, while green represents metabolites which have been validated with commercial standards.



### 3. Supporting tables

**Table S1:** A list of the standards synthesized from commercial aldehydes and ketones in this study.

| Substrate                             | Monoisotopic mass: | Predicted m/z: | RT / min:   |
|---------------------------------------|--------------------|----------------|-------------|
| Galactose                             | 180.0634           | 459.2085       | 4.78        |
| Glucose                               | 180.0634           | 459.2085       | 4.81        |
| Sodium mesoxalate monohydrate         | 117.9902           | 397.1353       | 4.89        |
| Ribose                                | 150.0528           | 429.1979       | 4.98        |
| β-Hydroxypyruvic acid                 | 104.0110           | 383.1561       | 5.17 / 5.71 |
| L-(+)-Erythrulose                     | 120.0423           | 399.1874       | 5.34        |
| Glycolaldehyde dimer                  | 60.0211            | 339.1662       | 5.35        |
| 2-Deoxy-D-ribose                      | 134.0579           | 413.2030       | 5.35        |
| Dihydroxyacetone                      | 90.0317            | 369.1768       | 5.45        |
| Glyoxylic acid                        | 74.0004            | 353.1455       | 5.56        |
| Formaldehyde                          | 30.01057           | 309.1557       | 5.7         |
| 3,3-Diethoxy-1-propanol               | 74.0368            | 353.1819       | 5.78 / 6.00 |
| Noroxymorphone hydrochloride solution | 287.1158           | 566.2609       | 5.79        |
| DL-Lactaldehyde solution (1 M)        | 74.0368            | 353.1819       | 5.92        |
| Hydroxyacetone                        | 74.0368            | 353.1819       | 5.95        |
| Acetaldehyde                          | 44.02622           | 323.1713       | 6.22        |
| Pyruvic acid                          | 88.0160            | 367.1611       | 6.35        |
| Acetoin                               | 88.0524            | 367.1975       | 6.49        |
| Lithium acetoacetate                  | 102.0317           | 381.1768       | 6.82        |
| Glutaraldehyde solution               | 100.0524           | 379.1975       | 6.82        |
| 2,3-Pentanedione                      | 100.0524           | 379.1975       | 6.85        |
| Acetone                               | 58.0419            | 337.1870       | 6.88        |
| Acetylacetone                         | 100.0524           | 379.1975       | 6.88 / 6.89 |
| 2-Ketobutyric acid                    | 102.0317           | 381.1768       | 7.18        |
| Levulinic acid                        | 116.0473           | 395.1924       | 6.89        |
| Propanal                              | 58.04187           | 337.1870       | 6.92        |
| 4-Hydroxybenzaldehyde                 | 122.0368           | 401.1819       | 7.68        |
| Butanone                              | 72.05752           | 351.2026       | 7.80        |
| Cyclopentanone                        | 84.05752           | 363.2026       | 7.91        |
| 2-Pentanone                           | 86.0732            | 365.2183       | 8.45        |
| Isovaleraldehyde                      | 86.0732            | 365.2183       | 8.59        |
| 2-Methylbutyraldehyde                 | 86.0732            | 365.2183       | 8.61        |
| Salicylaldehyde                       | 122.0368           | 401.1819       | 8.70        |
| Valeraldehyde                         | 86.0732            | 365.2183       | 8.71        |
| 2-Methylbutyraldehyde                 | 86.0732            | 365.2183       | 8.83        |
| Benzaldehyde                          | 106.0419           | 385.1870       | 9.00        |
| Acetophenone                          | 120.0575           | 399.2026       | 9.25        |
| 2-Hexanone                            | 100.0888           | 379.2339       | 9.29        |
| 2-Ethylbutyraldehyde                  | 100.0888           | 379.2339       | 9.31        |
| 3-Hexanone                            | 100.0888           | 379.2339       | 9.58        |
| Hexanal                               | 100.0888           | 379.2339       | 9.58        |
| 2-Methyl-3-pentanone                  | 100.0888           | 379.2339       | 9.60        |
| 4-Methyl-2-pentanone                  | 100.0888           | 379.2339       | 9.62        |
| o-Tolualdehyde                        | 120.0575           | 399.2026       | 9.66        |
| p-Tolualdehyde                        | 120.0575           | 399.2026       | 9.76        |
| m-Tolualdehyde                        | 120.0575           | 399.2026       | 9.78        |
| (±)-Jasmonic acid                     | 210.1256           | 489.2707       | 9.87        |
| Safranal                              | 150.1045           | 429.2496       | 10.90       |
| Octanal                               | 128.1201           | 407.2652       | 11.00       |
| 2-Octanone                            | 128.1201           | 407.2652       | 11.01       |
| (1R)-(-)-Myrtenal                     | 150.1045           | 429.2496       | 11.02       |
| R-Carvone                             | 150.1045           | 429.2496       | 15.52       |

**Table S2:** Previously reported carbonyl-containing metabolites.

| Carbonyl metabolite    | HMDB ID     |
|------------------------|-------------|
| D-Glucose              | HMDB0000122 |
| D-Ribose               | HMDB0000283 |
| Deoxyribose            | HMDB0003224 |
| Dihydroxyacetone       | HMDB0003224 |
| Glyoxylic acid         | HMDB0000119 |
| Acetoin                | HMDB0003243 |
| Propanal               | HMDB0003366 |
| 4-Hydroxybenzaldehyde  | HMDB0011718 |
| Isovaleraldehyde       | HMDB0006478 |
| Valeraldehyde          | HMDB0006478 |
| 2-Methylbutanal        | HMDB0031526 |
| Benzaldehyde           | HMDB0006115 |
| Methyl isobutyl ketone | HMDB0002939 |
| Octanal                | HMDB0001140 |

**Table S3:** Identified carbonyl metabolites linked to disease development.

| Carbonyl metabolite   | Link to disease                                                                                        |
|-----------------------|--------------------------------------------------------------------------------------------------------|
| Octanal               | Lung injury and disease                                                                                |
| 4-Hydroxynonenal      | Neurodegenerative diseases                                                                             |
| Glyoxylic acid        | Bladder infections; Primary hyperoxaluria                                                              |
| Isovaleraldehyde      | Hepatic encephalopathy                                                                                 |
| Ketoleucine           | Maple syrup urine disease (MSUD); colorectal cancer; Rheumatoid arthritis                              |
| 4-Hydroxybenzaldehyde | Colorectal cancer; obesity                                                                             |
| Acrolein              | Spinal cord injury, multiple sclerosis, Alzheimer's disease, cardiovascular disease, diabetes mellitus |
| Malondialdehyde       | Oxidative damage related diseases                                                                      |
| Dopamine quinone      | Parkinson's disease                                                                                    |
| Erythrose             | Schizophrenia                                                                                          |

## 4. General

All non-aqueous reactions were performed using flame- or oven dried glassware under an atmosphere of dry nitrogen. All reagents and solvents were purchased from Sigma-Aldrich or Fischer Scientific and were used without further purification. HPLC grade solvents were used for HPLC purification and mass spectrometry grade for UHPLC-ESI-MS analysis. Solutions were concentrated *in vacuo* on a Heidolph or a IKA rotary evaporator. Thin Layer Chromatography (TLC) was performed on silica gel 60 F-254 plates. Visualization of the developed chromatogram was performed using fluorescence quenching or staining with CAM (cerium ammonium molybdate), ninhydrin, Ehrlich reagent (4-(dimethylamino)benzaldehyde) or vanillin. Chromatographic purification of products was accomplished using flash column chromatography on Merck silica gel 60 (40–63  $\mu$ m) or preparative reverse phase HPLC on an Agilent HPLC-1100 series system equipped with a Symmetry Prep C18 column (19  $\times$  150 mm,

7  $\mu\text{m}$ ) at a 2.5 or 4.0 mL/min flow rate. All synthesized compounds were  $\geq 95\%$  pure as determined by NMR. NMR spectra were recorded on a Bruker 600 MHz spectrometer ( $^1\text{H}$  NMR: 600.18 MHz,  $^{13}\text{C}$  NMR: 150.92 MHz) or Agilent 400 MHz spectrometer ( $^1\text{H}$  NMR: 399.97 MHz,  $^{13}\text{C}$  NMR: 100.58 MHz) or Varian 300 MHz spectrometer ( $^{13}\text{C}$  NMR: 75.43 MHz). Chemical shifts are reported in parts per million (ppm) on the  $\delta$  scale from an internal standard. Multiplicities are abbreviated as follows: s = singlet, d = doublet, t = triplet, q = quartet, m = multiplet. Glass vials used for handling magnetic beads were microwave vials from Biotage (0.2-0.5 mL or 0.5-2.0 mL). High-resolution mass spectra were acquired on a SYNAPT G2-S High Definition Mass Spectrometer (HDMS) using an electrospray ionization (ESI) source with an ACQUITY UPLC I-class system and equipped with a Waters ACQUITY UPLC BEH C18 column (2.1  $\times$  75 mm, 1.7  $\mu\text{m}$  particle size) or Waters ACQUITY UPLC HSS T3 column (1.8  $\times$  100 mm, 2.1  $\mu\text{m}$  particle size). HPLC samples were analyzed by analytical reverse phase HPLC on an Agilent HPLC-1100 series system equipped with a Symmetry Prep C18 column (19  $\times$  100 mm, 3.5  $\mu\text{m}$ ) at a 0.25 mL/min flow rate.

## 5. Ethical approval

Patient fecal samples were obtained in accordance with the World Medical Association Declaration of Helsinki and all patients gave written informed consent. Approval for the study was obtained from the ethical committee at Karolinska Institutet Hospital (Ethical approval number: Dnr 2017/290-31). Fecal samples were collected using routine clinical collection protocols and all patient codes have been removed in this publication. All samples were stored at  $-80\text{ }^\circ\text{C}$ .

## 6. Description of procedures

### 6.1 UHPLC-MS analysis

Mass spectrometric analysis was performed on an Acquity UPLC system connected to a Synapt G2 Q-TOF mass spectrometer, both from Waters Corporation (Milford, MA, USA). The system was controlled using the MassLynx software package v 4.1, also from Waters. The separation was performed on an Acquity UPLC<sup>®</sup> BEH C18 column (1.7  $\mu\text{m}$ , 100 $\times$ 2.1 mm) from Waters Corporation. The mobile phase consisted of a combination of 0.1% formic acid in MilliQ water (A) and 0.1% formic acid in LC-MS grade methanol (B). The column temperature was  $40\text{ }^\circ\text{C}$  and the mobile phase gradient applied was as follows: 0-2 min, 0% B; 2-15 min, 0-100% B; 15-18 min, 100% B; 18-20 min, 100-0% B; 20-25 min, 0% B, with a flow rate of 0.3 mL/min.

The samples were introduced into the q-TOF using positive electrospray ionization. The capillary voltage was set to -2.50 kV and the cone voltage was 40 V. The source temperature was  $100\text{ }^\circ\text{C}$ , the cone gas flow 50 L/min and the desolvation gas flow 600 L/h. The instrument was operated in MSE mode, the scan range was  $m/z = 50\text{--}1200$ , and the scan time was 0.3 s. A solution of sodium formate (0.5 mM in 2-propanol: water, 90:10, v/v) was used to calibrate the instrument and a solution of leucine-enkephalin (2 ng/ $\mu\text{L}$  in acetonitrile: 0.1% formic acid in water, 50:50, v/v) was used for the lock mass correction at an injection rate of 30 s.

## **6.2 Preparation of bead-bound, unactivated probe 8**

The bead-bound, unactivated probe was prepared according to the method previously reported.<sup>1</sup>

## **6.3 Activation of carbonyl-specific chemoselective probe 2**

The bead-bound, unactivated probe **8** (320 nmol, carboxylate basis) were suspended in a solution of crude (Boc-aminooxy)acetic anhydride (2.5 mg, 6.9  $\mu$ mol) in DCM (200  $\mu$ L). The suspension was agitated at 25 °C in a ThermoMixer (1,500 rpm) for 16 h. After the reaction was complete, the supernatant was removed and the beads were washed with THF (3  $\times$  200  $\mu$ L). The beads were then suspended in a solution of DCM (200  $\mu$ L) and TFA (100  $\mu$ L) and agitated in a ThermoMixer (1,500 rpm) for 2 h. The beads were then washed with phosphate buffer (2  $\times$  200  $\mu$ L, 50 mM, pH 6.5).

## **6.4 Preparation of fecal metabolite extracts**

A scalpel was used to collect approximately 100 mg of the frozen fecal sample (stored at -80 °C). The sample was freeze-dried overnight. The correct amount of water was added (100  $\mu$ L ultrapure water for every 60 mg of dried fecal sample). The mixture was vortexed and subsequently homogenized by a FastPrep 24 homogenizer (3 cycles, 6 m/s, 40 s, MP Biomedicals) using specialized tube D (MP Biomedicals). The mixture was taken out from tube D into Eppendorf tubes, then centrifuged (18,620 g, 5 min, 4 °C) and the supernatant was collected. A portion of the supernatant (100  $\mu$ L) was combined with LC-MS grade methanol (400  $\mu$ L) and stored at -20 °C for at least 1 h. The suspension was vortexed, centrifuged (12,000 g, 5 min, 20 °C) and the solvents were removed from the supernatant through vacuum centrifugation. The residue was redissolved in phosphate buffer (200  $\mu$ L, pH 6.5, 50 mM).

## **6.5 Treatment of fecal metabolite extracts**

The activated beads **2** were used to treat the fecal extract (200  $\mu$ L in pH 6.5 phosphate buffer, 50 mM, derived from 100  $\mu$ L of supernatant). The mixture was shaken for 16 h at 1500 rpm and 25 °C. The fecal extract solution was removed from the beads and the beads were washed with THF (2  $\times$  200  $\mu$ L) before being resuspended in THF (300  $\mu$ L).

## **6.6 Cleavage of the bead-bound chemical probe 3**

The suspension of beads was transferred to a glass vial. Triphenylphosphine (97.0  $\mu$ L, 12.9 mM in THF, 1.25  $\mu$ mol) and dimethylbarbituric acid (90.0  $\mu$ L, 30.7 mM in THF, 2.76  $\mu$ mol) solutions were added to the vial, followed by palladium (II) acetate solution (84.0  $\mu$ L, 6.53 mM in THF, 549 nmol). The vial was quickly sealed and a stream of nitrogen was passed through until approximately half the volume of the suspension remained. The vial was agitated at intervals on a vortexer and the reaction was allowed to continue 5 h. In parallel, a sample of unmodified beads was treated with the same cleavage conditions as the activated beads treated with fecal extract and used as control sample. The supernatant was removed from the beads using magnetic separation and the solvent removed using a vacuum centrifuge. The residues were redissolved in MeOH (30  $\mu$ L each) and triphenylphosphine and triphenylphosphine oxide were precipitated through the addition of water (120  $\mu$ L each). The suspension was centrifuged (benchtop centrifuge, 12,000 g, 5 min), the supernatant removed,

and the solvent was again removed with the vacuum centrifuge. The residues were redissolved in water/acetonitrile solution (95:5 v/v) and submitted for LC-MS analysis.

### **6.7 Synthesis of Fmoc-protected simplified probe 11**

Compound **5** (40 mg, 89.8  $\mu$ mol) was combined with (Boc-aminooxy)acetic acid NHS ester (129 mg, 92  $\mu$ mol, prepared according to a literature procedure)<sup>2</sup> and DCM (2 ml). The reaction was stirred at room temperature for 18 h, before the solvents were removed under reduced pressure and the residue was purified by column chromatography (5:3 EtOAc/hexane rising to 3:1 EtOAc/hexane, followed by 100% EtOAc) to yield the product as a white solid (2.8 mg, 5 %).  $\delta_{\text{H}}$  (500 MHz, MeOD) 1.47 (s, 9H, Boc), 3.31 (m, 2H, obscured by residual solvent peak, FmocNHCH<sub>2</sub>), 3.55 (4H, m, ArCONHCH<sub>2</sub>, FmocNHCH<sub>2</sub>CH<sub>2</sub>), 3.64 (2H, t, *J* 5.3, ArCONHCH<sub>2</sub>CH<sub>2</sub>), 4.14 (1H, t, *J* 6.7, FmocCH), 4.29 (2H, d, *J* 7.0 Hz, FmocCH<sub>2</sub>), 4.39 (2H, s, BocNHC(O)CH<sub>2</sub>), 7.37 (2H, app. t, *J* 7.5, Fmoc Ar), 7.28 (2H, t, *J* 7.5, Fmoc Ar), 7.59 (2H, dd, *J* 7.5, 1.0, Fmoc Ar), 7.73 (2H, d, *J* 8.7, aminobenzoate), 7.77 (2H, d, *J* 7.5, Fmoc Ar), 7.81 (2H, d, *J* 8.7, *Ph*);  $\delta_{\text{C}}$  NMR (125.8 MHz, MeOD) 28.4, 41.0, 41.7, 49.6, 67.7, 70.5, 71.0, 77.0, 83.4, 120.2, 120.9, 126.1, 128.1, 128.8, 129.3, 131.1, 142.2, 142.6, 145.3, 159.0, 169.7, 170.0; *m/z* 619.2775 ([M+H]<sup>+</sup>, 100%) requires 619.2762.

### **6.8 Preparation of probe-conjugated standards**

A solution of Fmoc-protected probe **11** (50  $\mu$ l, 1.0 mM in MeOH, 50 nmol, Scheme S2) was evaporated under reduced pressure. The residue was combined with DCM (50  $\mu$ l) and TFA (100  $\mu$ l). The solution was shaken at 1500 rpm for 2 h, before the solvents were removed under reduced pressure. The residue was then combined with a solution of either four aldehyde/ketone standards (0.5 equiv. each in 400  $\mu$ l, 50 mM, pH 6.5 ammonium acetate buffer) or, for the LOD measurements, a single aldehyde/ketone standard (10 equiv. in 400  $\mu$ l, 50 mM, pH 6.5 ammonium acetate buffer). The resulting solution was then shaken at 1500 rpm for 18 h at 25 °C. The solvents were then removed under reduced pressure, and the residues were treated with piperidine (80  $\mu$ l) and shaken at 1500 rpm for 4 h at 25 °C. The piperidine was then removed under reduced pressure, and the residue was redissolved in MeOH (100  $\mu$ l) followed by water (400  $\mu$ l). The solution was diluted as necessary in a solution of water and acetonitrile (95:5 v/v) before being submitted for UPLC-MS analysis (see section 6.1).

### **6.9 LC-MS analysis**

Six injections were performed for fecal extract-treated bead cleavage product and six injections for the control sample. See section 6.1 for details of the UHPLC-MS analysis. For the first 90 s of the analysis, the output of the UHPLC system was diverted to waste and did not enter the mass spectrometer.

### **6.10 Data analysis**

Data files from the LC-MS analysis were converted into the NetCDF file format using MassLynx 4.1 (Waters). The XCMS library was used to perform peak detection and align the chromatograms.<sup>3</sup> The feature list was reduced by eliminating those features with an *m/z* value less than 279.1451 (the *m/z* value corresponding to the monoprotonated probe with no captured metabolite). More abundant features in the

control sample and less than five-fold higher abundance in the feces sample set were eliminated from the data analysis. Mass values of each feature with 279.1451 Da subtracted (corresponding to the mass of the probe) were compared to the human metabolome database in order to find plausible candidates for the parent metabolites. Commercial or synthetic standards (section 6.3) were then used to confirm the identity of the metabolites and identification of the correct regioisomers.

#### **6.11 Signal to noise calculation**

Signal to noise ratios were calculated according to European Pharmacopoeia guidelines.<sup>4</sup>

## **7. References**

1. N. Garg, L. P. Conway, C. Ballet, M. S. P. Correia, F. K. S. Olsson, M. Vujasinovic, J. M. Lohr and D. Globisch, *Angew Chem Int Edit*, 2018, **57**, 13805-13809.
2. M. Lelle and K. Peneva, *Amino Acids*, 2014, **46**, 1243-1251.
3. C. A. Smith, E. J. Want, G. O'Maille, R. Abagyan and G. Siuzdak, *Anal Chem*, 2006, **78**, 779-787.
4. T. Wenzl, H. Johannes, A. Schaechtele, P. Robouch and J. Stroka, *Guidance Document on the Estimation of LOD and LOQ for Measurements in the Field of Contaminants in Feed and Food*, European Union Reference Laboratory (EURL), DOI: 10.2787/8931, 2016.

## 8. NMR Spectra

### 1. Compound 11 $^1\text{H}$ NMR Spectrum

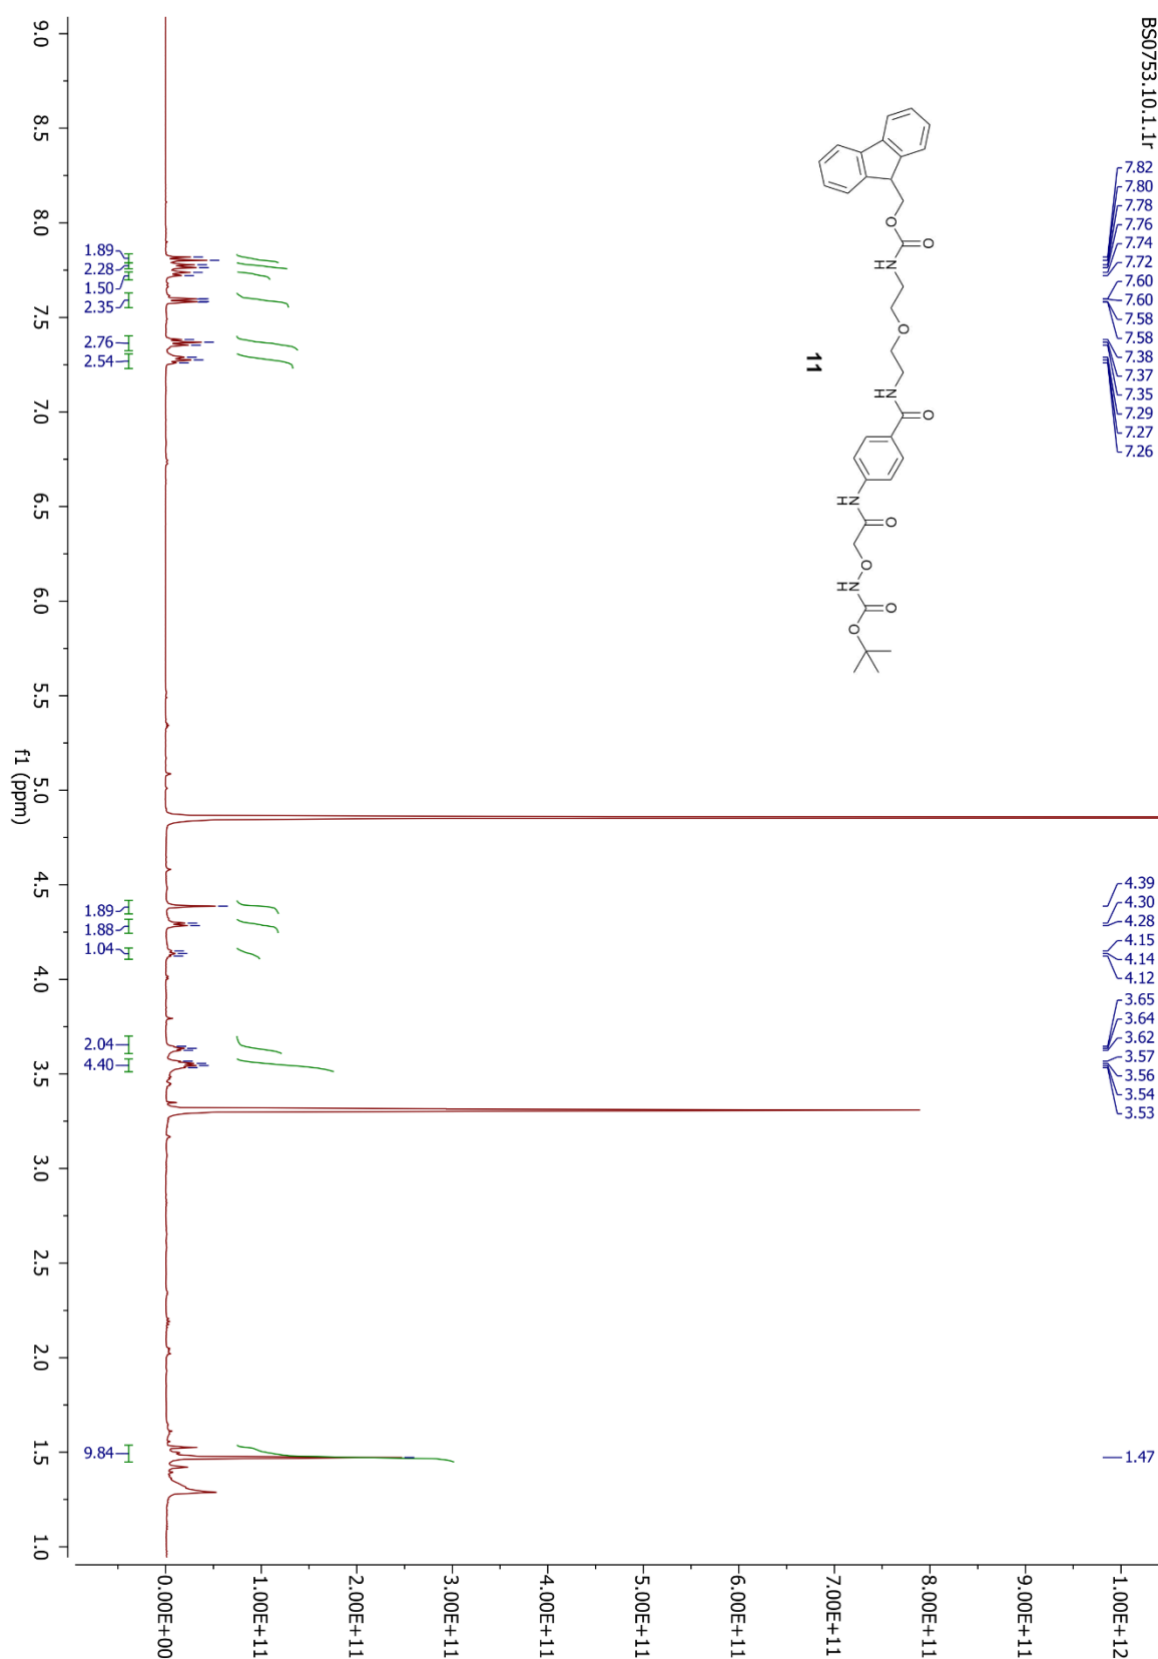

## 2. Compound 11 <sup>13</sup>C NMR Spectrum

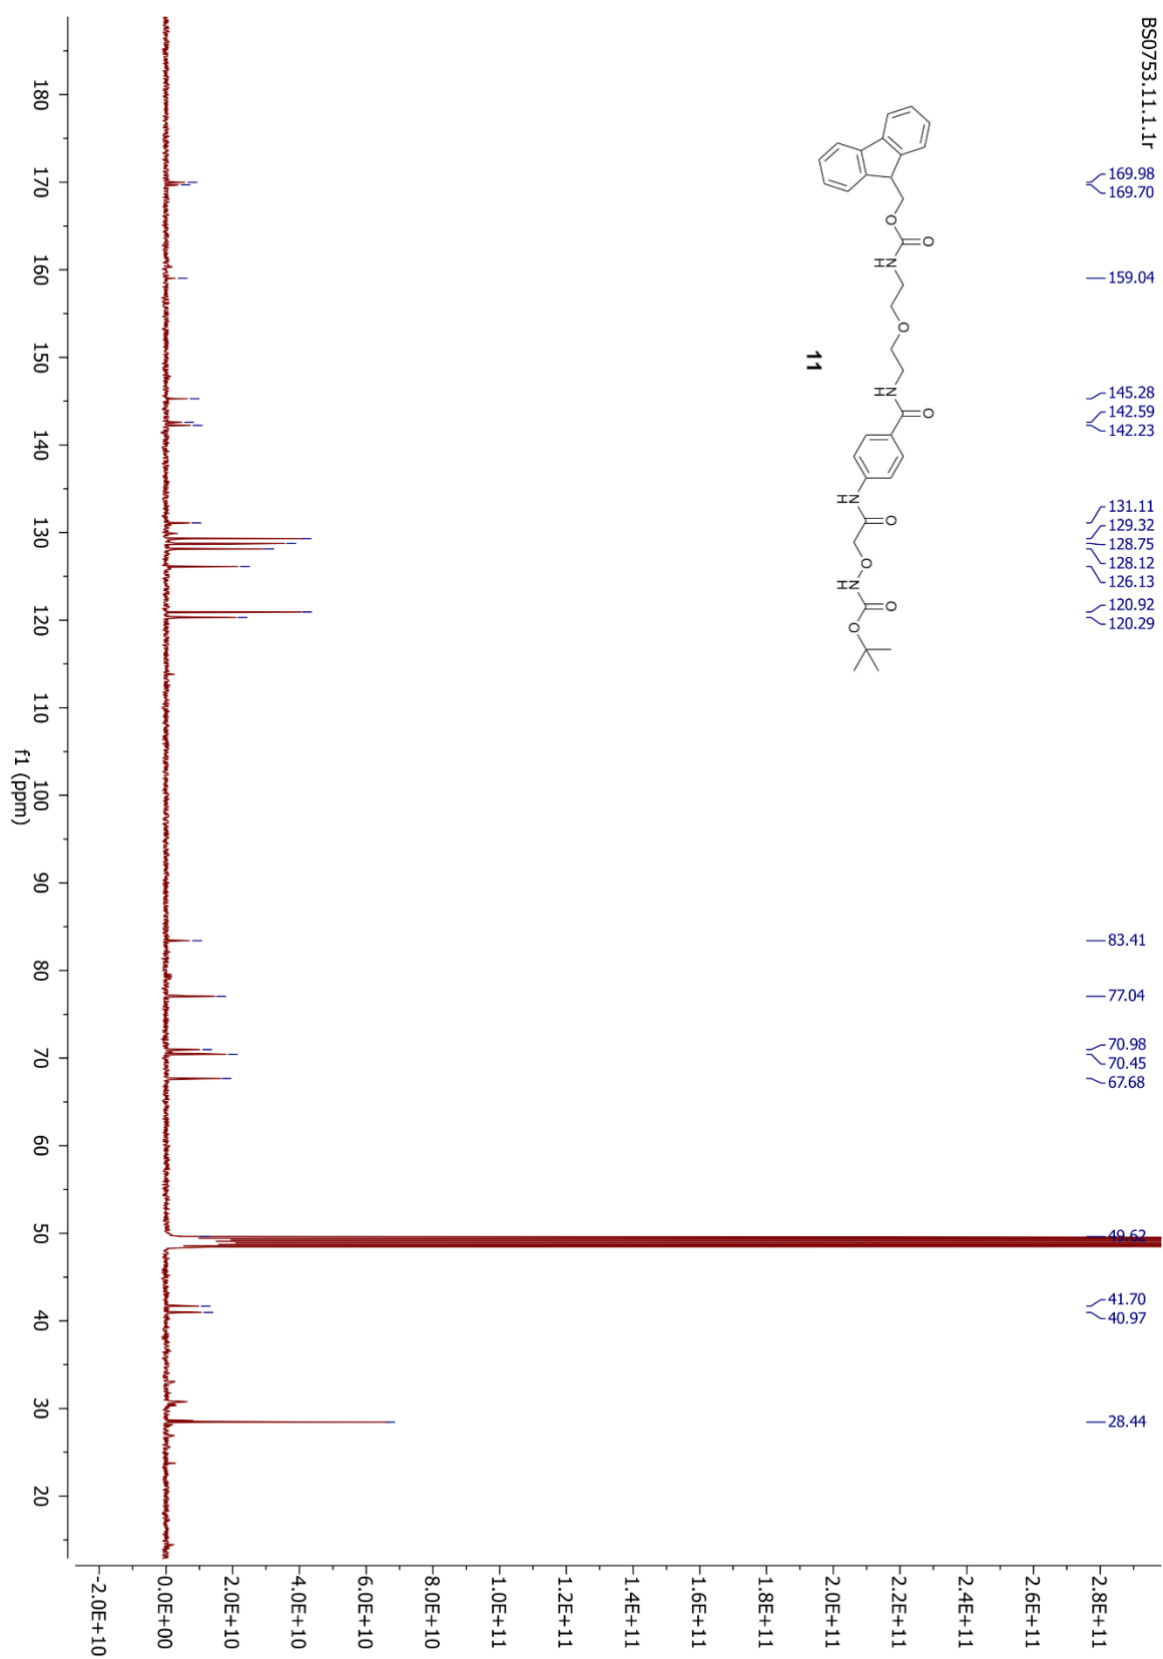



### 3. Compound 11 COSY NMR Spectrum

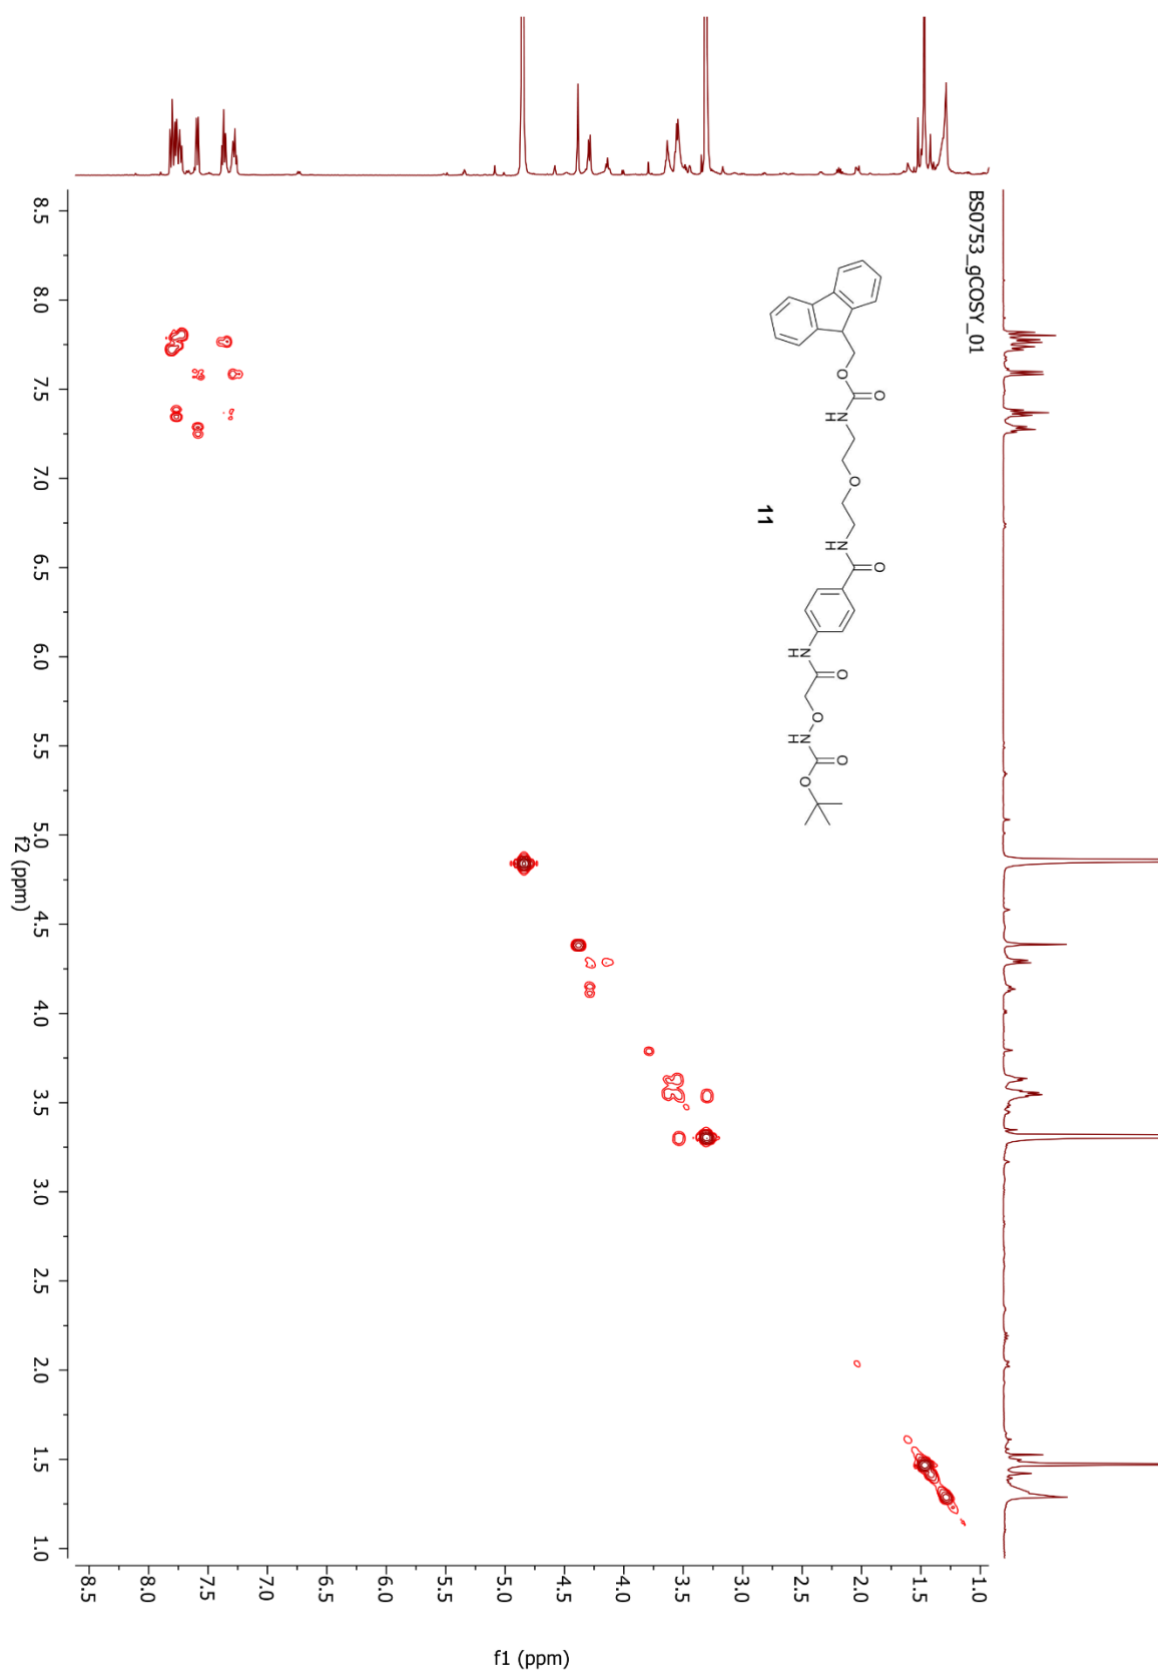

#### 4. Compound 11 HSQC NMR Spectrum

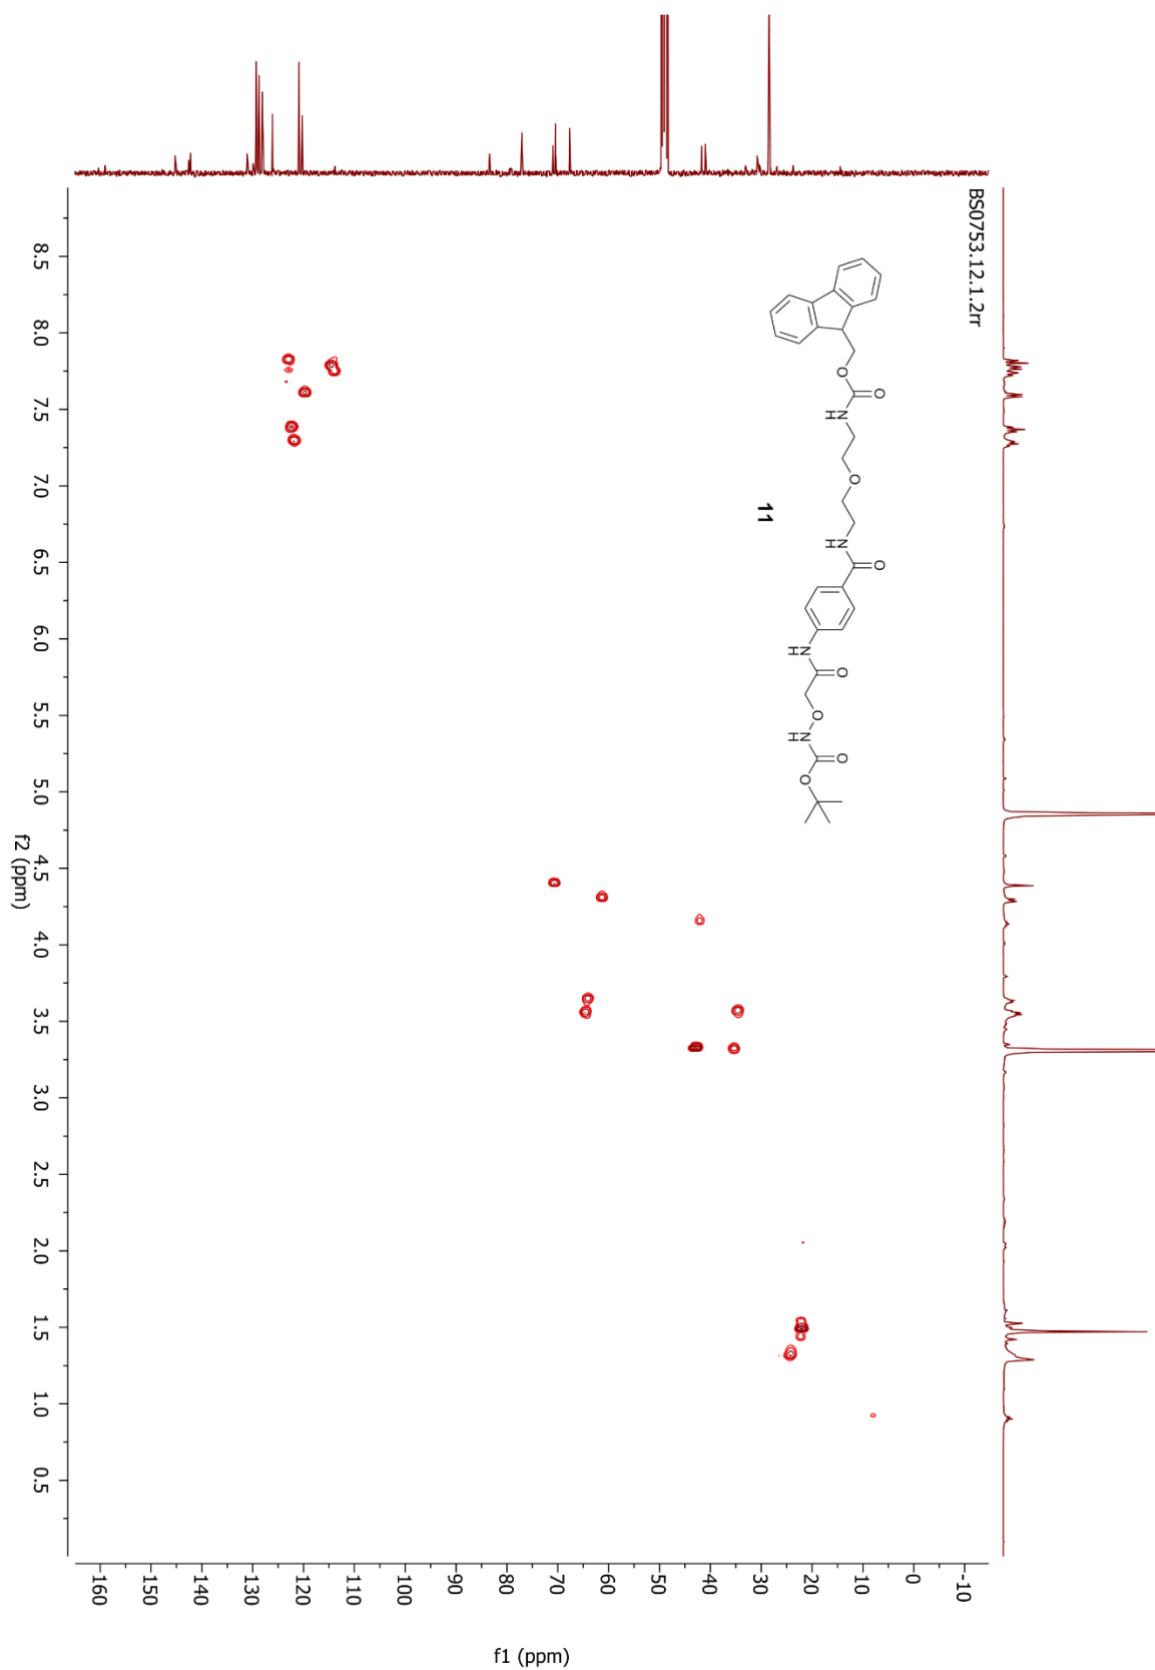

## 5. Compound 11 HMBC NMR Spectrum

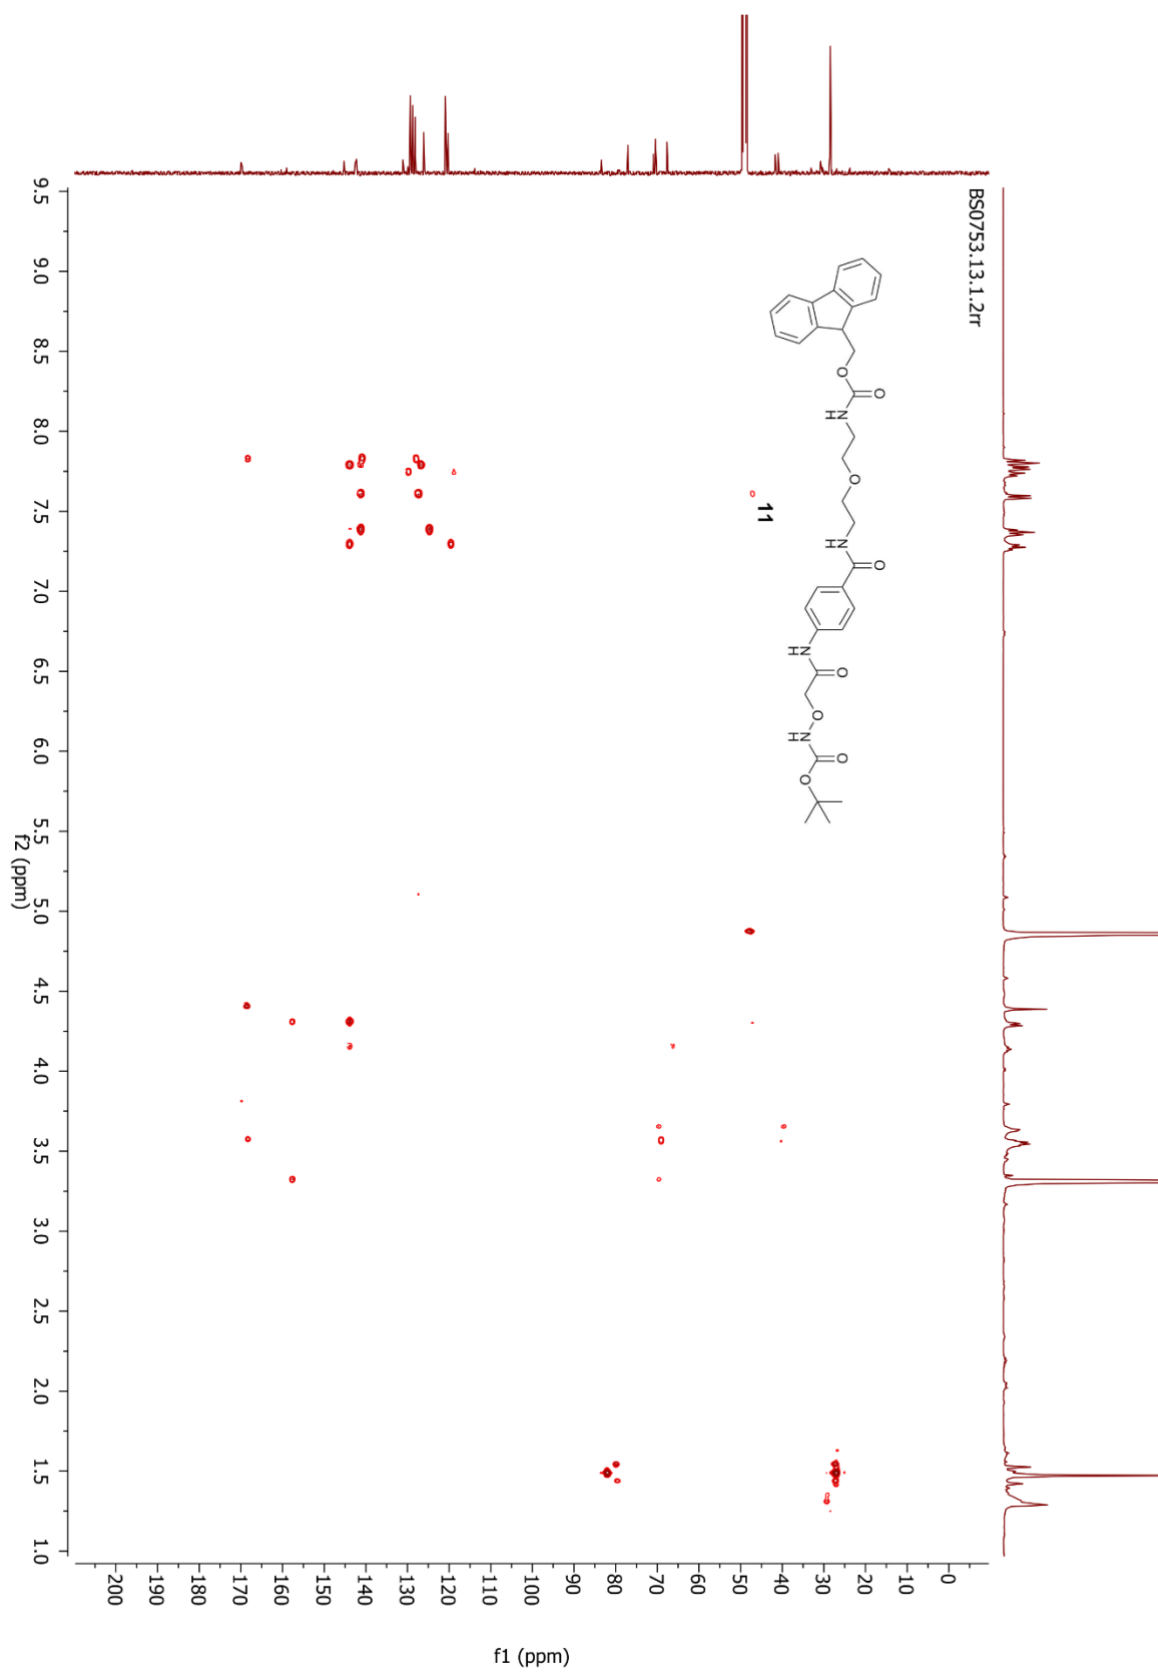

Supplement: c9cc04605d1.pdf [file c9cc04605d1.pdf]
